# Supplementary material
Source: publisher figshare collection journal article supplement (https://springernature.figshare.com/ndownloader/files/38288347)
Supplement: Supplementary file [file 38288347]

**Supplemental Table 1. List of approved and publicly available Value-Based Contracts (VBC) in USA, Europe, and UK (2015-2021)**

| USA <sup>(1-3)</sup> |                                   |                            |                                   |                                    |                                                                                                                                                                                                                                |      |
|----------------------|-----------------------------------|----------------------------|-----------------------------------|------------------------------------|--------------------------------------------------------------------------------------------------------------------------------------------------------------------------------------------------------------------------------|------|
| Brand name           | Drug                              | Manufacturer               | Payer(s)                          | Disease area                       | Outcome metric and terms                                                                                                                                                                                                       | Year |
| Stiolto®             | tiotropium bromide/<br>olodaterol | Boehringer<br>Ingelheim    | Highmark                          | COPD                               | Reduces the total cost for both in-patient and out-patient COPD care for members vs. other available drugs                                                                                                                     | 2019 |
| Enbrel®              | etanercept                        | Amgen                      | Abarca                            | Rheumatoid arthritis               | Rebates to Abarca's clients for eligible members who discontinue the use of the drug after three months of treatment.                                                                                                          | 2019 |
| Givlaari®            | givosiran                         | Alnylam<br>Pharmaceuticals | HPHC                              | Neurology Acute hepatic porphyria  | Payers will pay the full value for GIVLAARI only when it delivers patient outcomes in the real-world setting similar to results demonstrated in clinical trials.                                                               | 2019 |
| Tecfidera®           | dimethyl fumarate                 | Biogen                     | UPMC Health Plan                  | Multiple Sclerosis                 | Reimbursement by the drug manufacturer will be linked to reported measures of disability progression in a real-world population.                                                                                               | 2019 |
| Avonex®              | interferon beta-1a                | Biogen                     | UPMC Health Plan                  | Multiple Sclerosis                 | Reimbursement by the drug manufacturer will be linked to reported measures of disability progression in a real-world population.                                                                                               | 2019 |
| Luxturna®            | voretigene<br>neparovecrzyl       | Spark<br>Therapeutics      | Cigna                             | Retinal Dystrophy                  | Reduces net-cost to payer and determines payment amount based on selected clinical outcomes. If a Luxturna treatment fails (based on beneficiary light sensitivity), the payer would receive a rebate from Spark Therapeutics. | 2019 |
| Zolgensma®           | onasemnogene<br>abeparvovec-xioi  | Novartis (Avexis)          | Cigna; HPHC                       | Spinal muscular atrophy            | Refunds will take place if drug is not effective over 5 years                                                                                                                                                                  | 2019 |
| Mavyret®             | glecaprevir/pibrentas<br>vir      | AbbVie                     | WSHCA                             | Hepatitis C                        | -                                                                                                                                                                                                                              | 2019 |
| Brilinta®            | ticagrelor                        | AstraZeneca                | UPMC Health<br>Plan               | Acute Coronary Events              | Reimbursement linked to CV outcomes following a recent hospitalization for heart attack or unstable angina                                                                                                                     | 2019 |
| Invega Trinza®       | paliperidone<br>palmitate 2018    | Janssen                    | Oklahoma Health<br>Care Authority | Schizophrenia                      | Expenses for medical services                                                                                                                                                                                                  | 2018 |
| Fycompa®             | perampanel                        | Eisai                      | -                                 | Epilepsy                           | Patients' outcomes and healthcare utilization and costs, including costs related to hospitalizations                                                                                                                           | 2018 |
| Stelara®             | ustekinumab 2018<br>Immunology    | Janssen                    | Prime<br>Therapeutics             | Psoriasis                          | Pharmacy and medical claims data to determine the duration of benefit from therapy                                                                                                                                             | 2018 |
| Jardiance®           | empagliflozin                     | Boehringer<br>Ingelheim    | UPMC Health<br>Plan               | Diabetes                           | Reimbursement linked to costs associated with clinical outcomes in the real-world population                                                                                                                                   | 2018 |
| Orbativ®             | oritavancin                       | Melinta<br>Therapeutics    | Oklahoma Health<br>Care Authority | Acute Bacterial Skin<br>Infections | Refunds if oritavancin results in a net increase in costs.<br>Outcome based on reduction in hospitalizations when compared with conventional therapies                                                                         | 2018 |
| Aristada®            | aripiprazole lauroxil             | Alkermes                   | Oklahoma Health<br>Care Authority | Schizophrenia                      | Patients' adherence and improved outcomes                                                                                                                                                                                      | 2018 |
| Vivitrol®            | naltrexone                        | Alkermes                   | UPMC Health                       | Opioid Dependence                  | Positive clinical outcomes; Reduction in the risk of relapse; Increase in adherence                                                                                                                                            | 2018 |
| Cosentyx®            | secukinumab                       | Novartis                   | Prime<br>Therapeutics             | Psoriasis                          | Medication persistence/costs                                                                                                                                                                                                   | 2018 |
| Onpattro®            | patisiran                         | Alnylam<br>Pharmaceuticals | HPHC                              | hATTR Amyloidosis                  | Payment based on the ability to deliver outcomes in the real- world setting vs. performed clinical trials                                                                                                                      | 2018 |
| Jardiance®           | empagliflozin                     | Boehringer<br>Ingelheim    | Highmark                          | Diabetes                           | analysis of the total cost of care for adults with type 2 diabetes and established cardiovascular disease                                                                                                                      | 2018 |
| Symbicort®           | budesonide/formoter<br>ol         | AstraZeneca                | HPHC                              | Asthma                             | Harvard Pilgrim to be charged a lower amount if asthma exacerbations/worsening of symptoms requiring medical intervention in real-world settings exceed thresholds determined in clinical trials.                              | 2018 |

JoPPP

|                   |                           |                      |                              |                       |                                                                                                                                                                                                                |      |
|-------------------|---------------------------|----------------------|------------------------------|-----------------------|----------------------------------------------------------------------------------------------------------------------------------------------------------------------------------------------------------------|------|
| Symbicort®        | budesonide/formoterol     | AstraZeneca          | Highmark                     | Asthma, COPD          | If Symbicort doesn't perform as expected (based on outcomes published clinical trials), AstraZeneca will provide a corresponding rebate to Highmark.                                                           | 2018 |
| Victoza®          | liraglutide               | Novo Nordisk         | SelectHealth                 | Diabetes              | Effectiveness of Victoza to determine reimbursement to commercial clients if certain measures not achieved.                                                                                                    | 2018 |
| Repatha®          | evolocumab                | Amgen                | Abarca                       | Hypercholesterolemia  | Amgen provides additional discounts if LDL cholesterol reductions not in line with clinical trial results.                                                                                                     | 2018 |
| Jardiance®        | empagliflozin             | Boehringer Ingelheim | Prime Therapeutics           | Diabetes              | Medical and pharmacy claims data to evaluate and manage total cost of care                                                                                                                                     | 2018 |
| Luxturna®         | voretigene neparvovecrzyl | Spark Therapeutics   | HPHC; Express Scripts        | Retinal Dystrophy     | If the therapy fails to perform as agreed, the payer will receive a rebate from Spark Therapeutics.                                                                                                            | 2018 |
| Aimovig®          | erenumab-aooe             | Amgen / Novartis     | Express Scripts              | Migraine              | Money-back guaranteed for plan sponsors when a patient discontinues therapy in the first 90 days.                                                                                                              | 2018 |
| Victoza®          | liraglutide               | Novo Nordisk         | Prime Therapeutics           | Diabetes              | Overall costs; effectiveness                                                                                                                                                                                   | 2017 |
| Xtampza ER®       | oxycodone                 | Collegium            | Cigna                        | Pain management       | Collegium will reduce the cost of the medication if prescriptions exceed a specific daily dose threshold                                                                                                       | 2017 |
| MS Portfolio      | Multiple                  | Biogen               | HPHC; Moda Care; Select Care | Multiple Sclerosis    | Outcomes-based measures that tie pricing terms to an annualized relapse rate for their populations                                                                                                             | 2017 |
| MS Portfolio      | Multiple                  | Biogen               | Prime Therapeutics           | Multiple Sclerosis    | Patients' adherence; Biogen provides an incremental discount based on patients who discontinue our therapies within the initial weeks of treatment.                                                            | 2017 |
| MS Portfolio      | Multiple                  | Biogen               | Abarca                       | Multiple Sclerosis    | Biogen provides a rebate for discontinued treatment                                                                                                                                                            | 2017 |
| Brilinta®         | ticagrelor                | AstraZeneca          | HPHC                         | Acute Coronary Events | Outcome based on the reduction in hospitalizations for acute coronary events in Brilinta-treated patients vs. other oral antiplatelets.                                                                        | 2017 |
| Bydureon®         | exenatide                 | AstraZeneca          | HPHC                         | Diabetes              | HbA1c levels and adherence get to a predetermined HbA1c goal                                                                                                                                                   | 2017 |
| Repatha®          | evolocumab                | Amgen                | HPHC                         | Hypercholesterolemia  | Full refund for the drug if a patient is hospitalized for MI or stroke after ≥6-month treatment with Repatha while adhering to the drug                                                                        | 2017 |
| Enbrel®           | etanercept                | Amgen                | HPHC                         | Rheumatoid arthritis  | Two-year contract based on an effectiveness algorithm in real life. If patient scores are below a specified level while adhering to the drug, Harvard Pilgrim will pay less for Enbrel.                        | 2017 |
| Forteo®           | teriparaside              | Eli Lilly            | HPHC                         | Osteoporosis          | Rewards improvement in adherence compared to baseline; if meaningful improvements are found, Lilly reduces the cost of the drug for Harvard Pilgrim                                                            | 2017 |
| Victoza®          | liraglutide               | Novo Nordisk         | Humana                       | Diabetes              | -                                                                                                                                                                                                              | 2017 |
| Trulicity®        | dulaglutide               | Eli Lilly            | HPHC                         | Diabetes              | Price rebates tied to how well Trulicity performs vs. other GLP-1 agonists.                                                                                                                                    | 2016 |
| Entresto ®        | sacubitril/valsartan      | Novartis             | HPHC; Aetna; Cigna           | Chronic heart failure | Novartis accepts lower net price if hospitalization reduction rates do not replicate clinical trials.                                                                                                          | 2016 |
| Effient®          | prasugrel                 | Eli Lilly            | Humana                       | Acute coronary events | Links reimbursement to reductions in hospitalization rates                                                                                                                                                     | 2016 |
| Iressa®           | geitinib                  | Astra zeneca         | Express Scripts              | Lung cancer           | Number of patients who fill the medicine three times                                                                                                                                                           | 2016 |
| Repatha®          | evolocumab                | Amgen                | Cigna                        | Hypercholesterolemia  | Amgen provides additional discounts if LDL cholesterol reductions not in line with clinical trial results.                                                                                                     | 2016 |
| Brilinta®         | ticagrelor                | AstraZeneca          | UPMC Health Plan             | Acute Coronary Events | Measures the reduction in hospitalizations for repeat acute coronary events for patients on Brilinta against competitors                                                                                       | 2016 |
| Janumet®/Januvia® | Metformin/sitagliptin     | Merk                 | Aetna                        | Diabetes              | Merck will pay larger rebates if patients need to use additional therapy to reach HbA1C goals                                                                                                                  | 2016 |
| Repatha®          | evolocumab                | Amgen                | HPHC                         | Hypercholesterolemia  | Amgen provides additional discounts if LDL cholesterol reductions not in line with clinical trial results. Harvard Pilgrim can receive a full rebate if a patient experiences a MI or stroke while on the drug | 2015 |
| Repatha®          | evolocumab                | Amgen                | CVS Health                   | Hypercholesterolemia  | Net price linked to cholesterol reduction, appropriate patient use in return for preferred formulary status.                                                                                                   | 2015 |
| Repatha®          | evolocumab                | Amgen                | Prime Therapeutics           | Hypercholesterolemia  | Amgen provides additional discounts if LDL cholesterol reductions not in line with clinical trial results.                                                                                                     |      |

| Harvoni®                         | sofosbuvir/ledipasvir                                                            | Gilead                    | Cigna           | Hepatitis C                                                                       | Net price discount, linked to outcomes, in return for preferred formulary status.                                                                                                                                          | 2015 |
|----------------------------------|----------------------------------------------------------------------------------|---------------------------|-----------------|-----------------------------------------------------------------------------------|----------------------------------------------------------------------------------------------------------------------------------------------------------------------------------------------------------------------------|------|
| Praluent®                        | alirocumab                                                                       | Sanofi, Regeneron         | Cigna           | Hypercholesterolemia                                                              | Extra price discounts if results are not in line with clinical trial results                                                                                                                                               | 2015 |
| Avastin®                         | bevacizumab                                                                      | Genentech                 | Priority Health | Lung Cancer                                                                       | The shorter the PFS in a given patient, the greater the rebate to Priority Health. If a patient remained PFS on bevacizumab >6 months, Priority Health would not receive a rebate.                                         | 2015 |
| Tarceva®                         | erlotinib                                                                        | Genentech                 | Express Scripts | Pancreatic/Lung cancer                                                            | Specific details are not spelled, but price could depend on OS in different diseases (indication-based pricing)                                                                                                            | 2015 |
| <b>EU-Italy<sup>(2, 4)</sup></b> |                                                                                  |                           |                 |                                                                                   |                                                                                                                                                                                                                            |      |
| Brand name                       | Drug                                                                             | Manufacturer              | Payer(s)        | Disease area                                                                      | Outcome metric and terms                                                                                                                                                                                                   | Year |
| Zolgensma®                       | Onasemnogene abeparvovec                                                         | Novartis                  | SSN             | SMA                                                                               | Reimbursement in patients up to 13.5 kg in weight with a) clinical diagnosis and onset of symptoms in the first 6 months of life or b) genetic diagnosis. Reimbursement deal with checkpoints at 12, 24, 36, and 48 months | 2021 |
| Rubraca®                         | rucaparib                                                                        | Clovis Oncology           | SSN             | Ovarian Cancer                                                                    | Reimbursement in women with relapsed platinum-sensitive ovarian cancer                                                                                                                                                     | 2019 |
| Yescarta®                        | axicabtagene ciloleucel                                                          | Gilead Sciences           | SSN             | diffuse large B-cell lymphoma (DLBCL)                                             | Payments in three installments at 180, 270, and 365 days post-treatment, subject to outcomes being achieved and sustained. Specifics not disclosed                                                                         | 2019 |
| Kymriah®                         | tisagenlecleucel                                                                 | Novartis                  | SSN             | B-cell acute lymphoblastic leukaemia (ALL)                                        | Payments in three installments: the first at time of treatment, the subsequent two at 6 and 12 months post. Specifics not disclosed                                                                                        | 2019 |
| Kymriah                          | tisagenlecleucel                                                                 | Novartis                  | SSN             | diffuse large B-cell lymphoma (DLBCL)                                             | Payments in three installments: the first at time of treatment, the subsequent two at 6 and 12 months post. Specifics not disclosed                                                                                        | 2019 |
| Holoclar®                        | ex vivo expanded autologous human corneal epithelial cells containing stem cells | Holostem Terapie Avanzate | SSN             | Limbal stem cell deficiency (LSCD)                                                | -                                                                                                                                                                                                                          | 2017 |
| Vargatef®                        | nintedanib                                                                       | Boehringer Ingelheim      | SSN             | Non-small cell lung carcinoma                                                     | -                                                                                                                                                                                                                          | 2017 |
| Strimvelis®                      | autologous CD34+ enriched cell fraction                                          | GSK                       | SSN             | Severe combined immunodeficiency due to adenosine deaminase deficiency (ADA-SCID) | Pay-back in case of treatment failure                                                                                                                                                                                      | 2016 |
| Zelboraf®                        | vemurafenib                                                                      | Roche                     | SSN             | Melanoma                                                                          | -                                                                                                                                                                                                                          | 2015 |
| Sustent®                         | Sunitinib                                                                        | Pzifer                    | SSN             | Pancreatic neuroendocrine tumors                                                  | -                                                                                                                                                                                                                          | 2015 |
| Abraxane®                        | paclitaxel-albumina                                                              | Bristol Myers Squibb      | SSN             | Pancreatic tumor                                                                  | Effectiveness of the two agents in the enhancement of anti-tumor response vs. either agent alone                                                                                                                           | 2015 |
| <b>EU-SPAIN<sup>(5)</sup></b>    |                                                                                  |                           |                 |                                                                                   |                                                                                                                                                                                                                            |      |
| Brand name                       | Drug                                                                             | Manufacturer              | Payer(s)        | Disease area                                                                      | Outcome metric and terms                                                                                                                                                                                                   | Year |
| Crysvita®                        | Burosumab                                                                        | Kyowa Kirin               | NHS             | X-Linked hypophosphatemic rickets                                                 | Normalization of phosphate levels, resolving skeletal abnormalities and derived symptoms (pain). Follow up on the possible appearance of complications                                                                     | 2021 |
| Dupixent®                        | Dupilumab                                                                        | Sanofi-Aventis            | NHS             | Refractory atopic dermatitis                                                      | Reduction of symptoms (pruritus and dermatitis, prevention of exacerbations and minimization the risk of immunosuppressive treatment                                                                                       | 2020 |
| Veklury®                         | Remdesivir                                                                       | Gilead Sciences           | NHS             | COVID-19                                                                          | Prevention of the progression of the severity of the disease, promotion of clinical recovery and reduction of the length of hospital stay, and HCRU                                                                        | 2020 |

| Kymriah®                                                                                      | tisagenlecleucel                                                     | Novartis                | NHS      | ALL; DLBCL                                                          | Complete response with negative MRD for over 18 months                                                                                                                                                    | 2019 |
|-----------------------------------------------------------------------------------------------|----------------------------------------------------------------------|-------------------------|----------|---------------------------------------------------------------------|-----------------------------------------------------------------------------------------------------------------------------------------------------------------------------------------------------------|------|
| UK <sup>(6)</sup>                                                                             |                                                                      |                         |          |                                                                     |                                                                                                                                                                                                           |      |
| Brand name/Trial                                                                              | Drug                                                                 | Manufacturer            | Payer(s) | Disease area                                                        | Outcome metric and terms                                                                                                                                                                                  | Year |
| SPR1NT trial<br>[NCT03505099]                                                                 | Onasemnogene<br>abeparvovec                                          | Novartis                | NICE/NHS | SMA                                                                 | Clinical and cost-effectiveness                                                                                                                                                                           | 2021 |
| DESTINY-Breast02 trial<br>[NCT03523585]                                                       | Trastuzumab<br>deruxtecan                                            | Daiichi Sankyo          | NICE/NHS | Unresectable or<br>metastatic breast cancer                         | Relative effectiveness vs. other conventional therapies. PFS and OS data                                                                                                                                  | 2021 |
| SOLO-2 trial                                                                                  | Olaparib                                                             | AstraZeneca             | NICE/NHS | Advanced ovarian,<br>fallopian tube or primary<br>peritoneal cancer | PFS and OS data                                                                                                                                                                                           | 2021 |
| ZUMA-2 trial<br>[NCT02601313]                                                                 | Autologous anti-<br>CD19-transduced<br>CD3+ cells                    | Gilead                  | NICE/NHS | refractory mantle cell<br>lymphoma                                  | PFS, PPFS, and OS data and quality of life in long-term survivors                                                                                                                                         | 2021 |
| ENGOT-OV16/NOVA trial                                                                         | Niraparib                                                            | Glaxo Smith Kline       | NICE/NHS | Advanced ovarian,<br>fallopian tube and<br>peritoneal cancer        | OS and time to second progression; long-term PFS                                                                                                                                                          | 2021 |
| CLL13 trial (MO29596)<br>NCT02950051]                                                         | Venetoclax/obinutuzu<br>mab                                          | AbbVie                  | NICE/NHS | Chronic lymphocytic<br>leukaemia                                    | OS; Relative effectiveness vs. other conventional treatments                                                                                                                                              | 2020 |
| ICARIA-MM trial<br>[NCT02990338]                                                              | Isatuximab /<br>pomalidomide /<br>dexamethasone                      | Sanofi                  | NICE/NHS | relapsed and refractory<br>multiple myeloma                         | PFS and OS data; estimation of time-on-treatment; Proportion of patients who<br>progress onto 4 <sup>th</sup> line therapy                                                                                | 2020 |
| JAVELIN Renal 101<br>[NCT02684006]                                                            | Avelumab / axitinib                                                  | Merk / Pfizer           | NICE/NHS | Untreated advanced or<br>metastatic renal cell<br>carcinoma         | OS data; effectiveness for non-clear-cell disease; cost/benefits                                                                                                                                          | 2020 |
| STARTRK-2 and<br>STARTRK-NG trial                                                             | Entrectinib                                                          | Roche                   | -        | Solid tumors                                                        | Prevalence and characterization of NTRK gene fusions and tumor type; long-<br>term efficacy and safety; comparative effectiveness                                                                         | 2020 |
| NAVIGATE<br>[NCT02576431], SCOUT<br>[NCT02637687] and<br>LOXO-TRK-14001trial<br>[NCT02122913] | Larotrectinib                                                        | Bayer                   | -        | Solid tumors                                                        | Prevalence and characterization of NTRK gene fusions and tumor type;<br>Prognostic importance of NTRK gene fusions; Management of patients; Long-<br>term survival; Post-progression health utility state | 2020 |
| ENGOT-OV16/NOVA trial                                                                         | Niraparib                                                            | Glaxo Smith Kline       | NICE/NHS | Ovarian cancer                                                      | PFS and OS data                                                                                                                                                                                           | 2019 |
| Not specified                                                                                 | Cerliponase alfa                                                     | BioMarin                | NICE/NHS | CLN2 Disease                                                        | Long-term disease stabilization; Improvements in motor language score starting<br>distribution                                                                                                            | 2019 |
| ARIEL3 trial                                                                                  | Rucaparib                                                            | Clovis oncology         | NICE/NHS | Relapsed ovarian,<br>fallopian tube or primary<br>peritoneal cancer | OS data                                                                                                                                                                                                   | 2019 |
| KEYNOTE-407 trial<br>[NCT02775435]                                                            | Pembrolizumab /<br>carboplatin /<br>paclitaxel or nab-<br>paclitaxel | Merk                    | NICE/NHS | metastatic squamous<br>non-small-cell lung<br>cancer                | OS vs. standard care                                                                                                                                                                                      | 2019 |
| SOLO-1 trial                                                                                  | Olaparib                                                             | AstraZeneca             | NICE/NHS | Advanced ovarian,<br>fallopian tube or primary<br>peritoneal cancer | Long-term OS; Proportion of patients who have residual disease at 2 years                                                                                                                                 | 2019 |
| CheckMate 214 trial<br>[NCT02231749]                                                          | Nivolumab /<br>ipilimumab                                            | Bristol-Myers<br>Squibb | NICE/NHS | Advanced renal cell<br>carcinoma                                    | Long-term benefit in OS; Treatment duration; Subsequent therapies used in<br>clinical practice; Proportion of patients with poor-risk or intermediate-risk renal<br>cell carcinoma in clinical practice   | 2019 |

|                                                   |                                          |                      |          |                                                                       |                                                                                                                                                                                     |      |
|---------------------------------------------------|------------------------------------------|----------------------|----------|-----------------------------------------------------------------------|-------------------------------------------------------------------------------------------------------------------------------------------------------------------------------------|------|
| MONARCH 2 trial                                   | Abemaciclib / fulvestrant                | Eli Lilly            | NICE/NHS | Breast cancer                                                         | Long-term survival data; Estimation of time-on-treatment                                                                                                                            | 2019 |
| PACIFIC trial                                     | Durvalumab                               | Astra Zeneca         | NICE/NHS | Unresectable non-small cell lung cancer                               | Long-term PFS and OS benefit following discontinuation                                                                                                                              | 2019 |
| JULIET trial                                      | Tisagenlecleucel                         | Novartis             | NICE/NHS | relapsed or refractory diffuse large B-cell lymphoma                  | OS data; proportion of people who need treatment for B-cell aplasia with Ig and duration of treatment                                                                               | 2019 |
| ZUMA-1 trial [NCT02348216]                        | Axicabtagene ciloleucel                  | Gilead Sciences      | NICE/NHS | diffuse large B-cell lymphoma and primary mediastinal B-cell lymphoma | OS at 5-year follow-up; convergence of PFS and OS curves at 5-years follow-up; intravenous Ig use                                                                                   | 2019 |
| EMPOWER-CSCC 1 trial                              | Cemiplimab                               | Sanofi               | NICE/NHS | cutaneous squamous cell carcinoma                                     | Baseline characteristics of the target population<br>Long-term benefit<br>Comparative effectiveness with standard treatments in clinical practice                                   | 2019 |
| CASTOR trial                                      | Daratumumab / bortezomib / dexamethasone | Janssen              | NICE/NHS | multiple myeloma                                                      | OS at 6 years                                                                                                                                                                       | 2019 |
| KEYNOTE-087 trial                                 | Pembrolizumab                            | Merck                | NICE/NHS | refractory classical Hodgkin lymphoma                                 | The time at which allogeneic stem cell transplant occurs. proportion of patients who receive an allogeneic stem cell transplant                                                     | 2018 |
| Not specified                                     | Daratumumab                              | Janssen              | NICE/NHS | multiple myeloma                                                      | OS<br>Subsequent treatment following daratumumab                                                                                                                                    | 2018 |
| PROFILE 1001 trial                                | Crizotinib                               | Pfizer               | NICE/NHS | ROS1-positive advanced non-small-cell lung cancer                     | Effectiveness comparison with standard care<br>Post-progression and overall survival estimates                                                                                      | 2018 |
| IMvigor 130 trial                                 | Atezolizumab                             | Roche                | NICE/NHS | Untreated metastatic urothelial cancer                                | OS and PFS compared with standard care<br>HRQoL for patients with SD and PD receiving atezolizumab and standard care                                                                | 2018 |
| ELIANA, ENSIGN and B2101J trials                  | Tisagenlecleucel                         | Novartis             | NICE/NHS | relapsed or refractory B-cell acute lymphoblastic leukaemia           | Curative nature of tisagenlecleucel<br>Subsequent stem cell transplant<br>Number of people who need treatment for B-cell aplasia with intravenous Ig, and duration of the treatment | 2018 |
| KEYNOTE-054 trial [NCT02362594]                   | Pembrolizumab                            | Merk Sharp Dohme     | NICE/NHS | melanoma                                                              | Distant metastases free survival and OS benefit vs, standard therapy                                                                                                                | 2018 |
| TOURMALINE MM-1 trial                             | Ixazomib / lenalidomide / dexamethasone  | Takeda               | NICE/NHS | relapsed or refractory multiple myeloma                               | OS; Duration of treatment; Quality of life (EQ 5D)                                                                                                                                  | 2018 |
| Study 1118E and the phase 3 Study 1127 [iNNOVATE] | Ibrutinib                                | Janssen              | NICE/NHS | Waldenstrom's macroglobulinaemia                                      | Pre-progression mortality and treatment duration                                                                                                                                    | 2017 |
| CheckMate 141                                     | Nivolumab                                | Bristol-Myers Squibb | NICE/NHS | Recurrent or metastatic squamous-cell carcinoma of the head and neck  | Effectiveness according to PD-L1 expression                                                                                                                                         | 2017 |
| Not specified                                     | Venetoclax                               | AbbVie               | NICE/NHS | chronic lymphocytic leukaemia                                         | OS; PPS                                                                                                                                                                             | 2017 |

HPHC = Havard Pilgrim Health Care; OS = Overall survival; PFS = Progression-free survival; PPFS = Post-progression-free survival; SSN = National Health System (Italy); UPMC = University of Pittsburgh Medical Center; WSHCA = Washington State Healthcare Authority.

#### **SUPPLEMENTAL REFERENCES**

1. PHRMA.ORG. Innovative contracts: 2009-2020. 2020.
2. Jørgensen J, Kefalas P. The use of innovative payment mechanisms for gene therapies in Europe and the USA. *Regenerative Medicine*. 2021;16(4):405-22.
3. Group DR. Value-Based Contracting in Pharmaceuticals - January 2019 update. 2019.
4. AIFA. Lista aggiornata dei Registri e dei Piani Terapeutici 2021.
5. Government MoHotS. istema de Información para determinar el Valor Terapéutico en la Práctica Clínica Real de los Medicamentos de Alto Impacto Sanitario y Económico en el SNS (VALTERMED). 2021.
6. (UK) NifHaCE. Updated list of approved drugs. 2021.
